# Supplementary material for: Identification of rare disease genes as drivers of common diseases through tissue-specific gene regulatory networks
Source: PubMed Central journal article supplement (PMC11618476; doi:10.1038/s41598-024-80670-1), 2024-12-04
Supplement: 41598_2024_80670_MOESM1_ESM.pdf [file 41598_2024_80670_MOESM1_ESM.pdf]

1 **Supplementary data for: Identification of rare disease genes as drivers of common**  
2 **diseases through tissue-specific gene regulatory networks**

3 Note S1. Quality control and sample selection of Recount3 data

4 Note S2. Tissue prediction and per tissue quality control of Recount3 data

5 Fig. S1. Association between PascalX gene z-score profiles of different traits

6 Fig. S2. Association between average PascalX gene z-score and LD and gene density

7 Fig. S3. Enrichment of missense and loss of function intolerance in the average PascalX  
8 gene z-score

9 Fig. S4. Results on null data with correlation structure and evaluation of optimal  
10 threshold for eigenvector selection

11 Table S1. List of the 88 complex traits and diseases to which we applied Downstreamer

12 Table S2. List of included tissues

13 Table S3. Enrichment of top 500 genes from average GWAS signal

14 Table S4. Significant tissues per trait

15 Table S5. Significant key genes (Downstreamer) per trait

16 Table S6. Significant GWAS genes (PascalX) per trait

17 Table S7. HPO enrichments of key (Downstreamer) genes per trait

18

19 **Note S1. Quality control and sample selection of Recount 3 data**

20 Phase 1: We first performed a basic quality control (QC) of samples using the following steps.

- 21 • Remove samples annotated as single cell (n=74,412).
- 22 • Remove 4SU-labelled samples (n=1,589).
  - 23 ○ Mention of '4su' or 'thiouridine' in one of these columns:
  - 24 "sra.library\_construction\_protocol"; "sra.study\_abstract";
  - 25 "sra.experiment\_title"; "sra.design\_description"; "sra.sample\_description";
  - 26 "sra.library\_construction\_protocol"; "sra.sample\_attributes"; "sra.sample\_title"
- 27 • Remove samples with only NaN expression values (n=239).
- 28 • Remove samples with missing metadata (n=1,711).
- 29 • Exclude samples based on the following QC metrics (n=96,597):
  - 30 ○ sra.sample\_spots <1e6 or >2e8
  - 31 ○ for TCGA samples, recount\_qc.bc\_frag.count <1e6 or >2e8
  - 32 ○ recount\_qc.star.uniquely\_mapped\_reads\_% <60%
  - 33 ○ recount\_qc.aligned\_reads%.chrM >20%
  - 34 ○ recount\_qc.aligned\_reads%.chrX >6%
  - 35 ○ recount\_qc.aligned\_reads%.chrY >0.5%
  - 36 ○ recount\_seq\_qc.%n >2%
  - 37 ○ recount\_seq\_qc.%a <20% or >35%
  - 38 ○ recount\_seq\_qc.%c <20% or >35%
  - 39 ○ recount\_seq\_qc.%g <20% or >35%
  - 40 ○ recount\_seq\_qc.%t <20% or >35%
  - 41 ○ recount\_qc.star.%\_of\_reads\_mapped\_to\_too\_many\_loci >0.5%
  - 42 ○ recount\_qc.junction\_count >500,000
  - 43 ○ recount\_qc.star.deletion\_average\_length >3
  - 44 ○ recount\_qc.star.number\_of\_splices:\_total <150,000
  - 45 ○ recount\_qc.intron\_sum\_% >20
  - 46 ○ recount\_qc.bc\_auc.unique\_% <125
- 47 • Exclude all data from study SRP025982 (mixed tissues and spiked data for benchmarks).

48 Phase 2: We only retained genes that were expressed in at least 50% of the samples.

49 Phase 3: We performed another sample QC using only the maintained genes.

- 50 • Exclude samples with 0 expression >50% of the genes.
- 51 • Remove duplicate samples.
- 52 • Exclude samples with 0 variance.
- 53 • Use singular value decomposition (SVD) on quantile-normalised expression to remove
- 54 outliers on the first component.

55 Phase 4: We corrected the remaining samples for covariates using the following steps.

- 56 • Correct the expression data for the following technical covariates:
  - 57 ○ recount\_seq\_qc.avg\_len
  - 58 ○ sra.sample\_spots
  - 59 ○ recount\_qc.bc\_frag.count

- 60 ○ recount\_qc.star.uniquely\_mapped\_reads\_%
- 61 ○ sra.library\_layout
- 62 ○ recount\_qc.aligned\_reads%.chrM
- 63 ○ recount\_qc.aligned\_reads%.chrX
- 64 ○ recount\_qc.aligned\_reads%.chrY
- 65 ○ recount\_seq\_qc.%a
- 66 ○ recount\_seq\_qc.%c
- 67 ○ recount\_seq\_qc.%g
- 68 ○ recount\_seq\_qc.%t
- 69 ○ recount\_qc.bc\_auc.unique\_%
- 70 ○ recount\_qc.intron\_sum\_%
- 71 ○ recount\_qc.star.%\_of\_reads\_mapped\_to\_too\_many\_loci
- 72 ○ recount\_qc.junction\_count
- 73 ○ recount\_qc.star.deletion\_average\_length
- 74 ● 675 SRA samples were excluded due to missing covariate data. The total number of
- 75 samples included was 142,849.

76 Phase 5: We predicted cell lines and cancer samples. The predictions were based on the sample  
77 principal components and trained using the annotations known for a subset of the samples. For the  
78 prediction of primary tissues vs cell lines, we used logistic regression using the principal  
79 components.

80 For the prediction of cancer samples, we used the method developed by Fehrmann *et al.*<sup>51</sup>. This first  
81 determines the auto-correlation per component, which is higher for components that reflect copy  
82 number alterations. The sample loadings are then used to create a score per sample that indicates  
83 the number of copy number alterations in the samples. We then used this score in a second logistic  
84 regression model that discriminated between primary tissues and cancer samples.

85 Neither of these models yielded perfect separation between the three classes of samples. While this  
86 is in part driven by erroneous annotations in the public repositories, it did allow us to select samples  
87 that are likely to be primary tissues or cell types.

88 51. Fehrmann, R. S. N. *et al.* Gene expression analysis identifies global gene dosage sensitivity in  
89 cancer. *Nat. Genet.* **47**, 115–125 (2015).

90 **Note S2. Tissue prediction and per-tissue quality control of Recount3 data**

91 To predict tissues for the samples that are predicted not to be cell lines or cancerous, we started  
92 anew with transcripts per million values. We selected the genes expressed in at least 50% of the  
93 samples, performed log<sub>2</sub> and quantile normalisation and corrected for the same covariates as  
94 before. We then performed a new principal component analysis and used the components in a  
95 multinomial logistic regression model trained on the known sample annotations.

96 One major confounder with tissue type is the associated study. Typically, samples from the same  
97 study are sequenced using the same type of sequencer and read length, and most studies  
98 investigate a single tissue. But there are many differences among the different studies. We can  
99 correct for these to some extent by including technical differences as confounders, but we found  
100 that this adversely affected our prediction accuracy. We therefore devised the following strategy to

101 create a representative training set. Ideally, we would only use a single sample per tissue from each  
102 study to train the prediction model. In practice, for some tissues, this would result in a rather limited  
103 number of usable samples. To overcome this, we increased the number of samples per tissue per  
104 study to ensure at least 50 training samples per tissue. Based on early tests, we noticed that we  
105 could not reliably discriminate between adipose and breast samples. These samples were therefore  
106 combined in a single adipose-breast network that we refer to as a 'breast' network in this  
107 manuscript for clarity.

108 We then used the R package *glmnet*<sup>52</sup> to do lasso regression with cross validation to select an  
109 optimal lambda. This model was then applied to all samples, and we assigned each sample the tissue  
110 with the highest posterior probability. Samples for which the highest posterior probability was less  
111 than 0.5 were excluded.

112 As a final quality control, we performed a principal component analysis per tissue and excluded  
113 outliers. This resulted in 46,410 samples. Per tissue, we eventually used VST<sup>45</sup> for the normalisation  
114 and corrected the data for the covariates. A SVD was used to extract the eigenvectors with gene  
115 loadings that are used by Downstreamer for the gene prioritisation.

116 For the Recount3 multi-tissue network, we used quantile normalisation and covariate correction for  
117 the 46,410 samples for which we have a predicted tissue assignment. Here we used SVD to obtain  
118 the eigenvectors.

119 52. Friedman, J. H., Hastie, T. & Tibshirani, R. Regularization Paths for Generalized Linear Models via  
120 Coordinate Descent. *J. Stat. Softw.* **33**, 1–22 (2010).

121 **Fig. S1. Association between PascalX gene z-score profiles of different traits**

122 Provided separately.

123 *A) Pearson correlations between gene z-scores reveal that most pairwise correlations between traits are positive. B) Mean*  
124 *correlation in gene z-scores with all other GWASs (y-axis) versus the number of samples in the GWAS (x-axis). C) Mean*  
125 *correlation in gene z-scores with all other GWASs (y-axis) versus the number of independent genome-wide significant hits*  
126 *for the respective GWAS determined by clumping  $\pm 500\text{kb}$  window and an  $r^2$  of 0.1.*

127

128 **Fig. S2. Association between average PascalX gene z-score and LD and gene density**

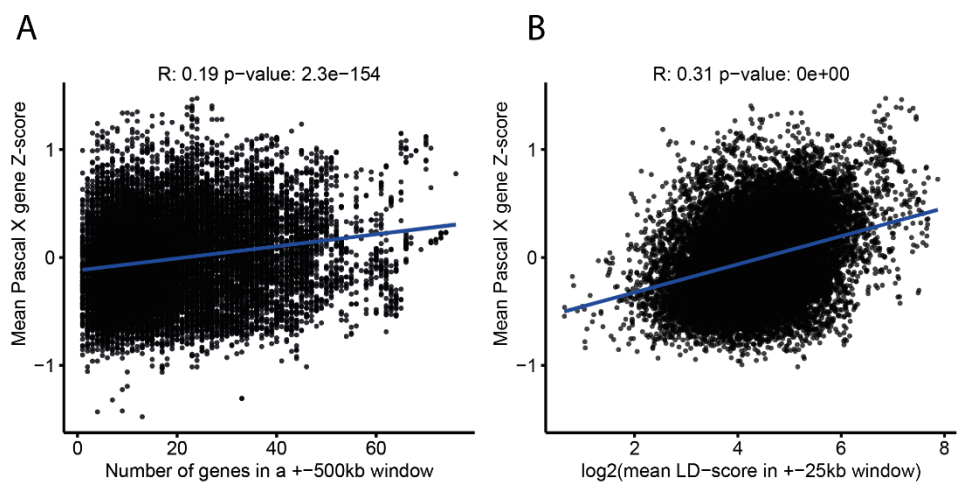

129

130 A) Association between average gene z-score (y-axis) and the number of genes within a  $\pm 500$ kb window (x-axis). B) As in  
131 (A), but x-axis indicates the log2 of the average LD score of SNPs located  $\pm 25$ kb around the start and end of a gene. The  
132 adjusted  $r^2$  of the model associating the average gene z-score and these two parameters as the independent variables is  
133 0.147. p-value  $< 1e-16$ .

134

135 **Fig. S3. Enrichment of missense and LoF intolerance in the average PascalX gene z-score**

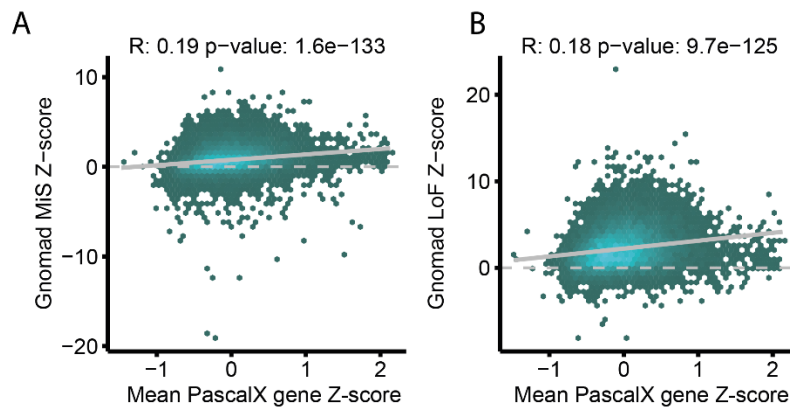

136

137 A) Association between average gene z-score (x-axis) and the missense intolerance z-scores from the gnomAD consortium  
138 (y-axis). B) As in (A), but the y-axis indicates the z-score for LoF intolerance.

139

140 **Fig. S4.** Results on null data with correlation structure and evaluation of optimal threshold  
 141 for eigenvector selection

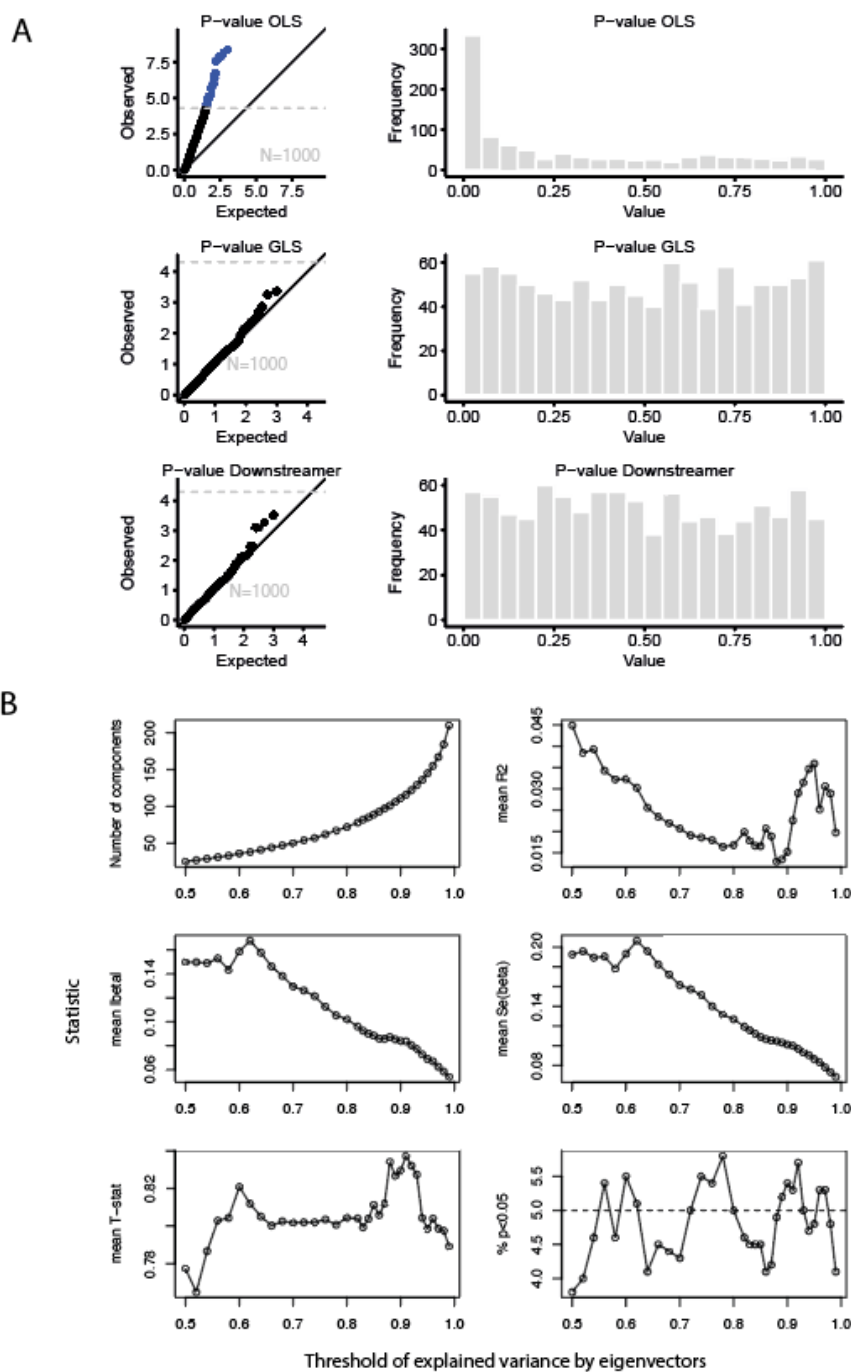

142

143 A) Results on simulated data with representative correlation structure for 1000 randomly generated phenotypes. From top  
 144 to bottom: OLS model, GLS model and Downstreamer model. Both Downstreamer and GLS produce well-calibrated p-values  
 145 under the null model. B) Evaluation of the optimal number of eigenvectors to use in the approximate GLS model. Evaluated  
 146 here for the same simulated data as A, mean statistics for the 1000 pathways are shown on the y-axes, except for the first  
 147 plot which shows the number of eigenvectors, representing the degrees of freedom +1. X-axis shows the percentage of  
 148 variance explained by the eigenvectors. Y-axes show different statistics on the output. A threshold of 0.9 was chosen as it  
 149 yielded optimal power, a mean model  $r^2$  close to zero, low standard errors and higher T statistics. We note that the  
 150 simulated data had positive-definite correlation structure, but on real data, inclusion thresholds above 0.9 tend to give rise  
 151 to inflation as their eigenvalues are approaching the precision limit or are negative.



152 **Table S1.** *The 88 complex traits and diseases to which we applied Downstreamer*

153 **Table S2.** *List of tissues included*

154 **Table S3.** *Enrichment of top 500 genes from average GWAS signal*

155 **Table S4.** *Significant tissues per trait*

156 **Table S5.** *Significant key genes (Downstreamer) per trait*

157 **Table S6.** *Significant GWAS genes (PascalX) per trait*

158 **Table S7.** *HPO enrichments of key (Downstreamer) genes per trait*

159
