# Supplementary material for: Identification of rare disease genes as drivers of common diseases through tissue-specific gene regulatory networks
Source: PubMed Central journal article supplement (PMC11618476; doi:10.1038/s41598-024-80670-1), 2024-12-04

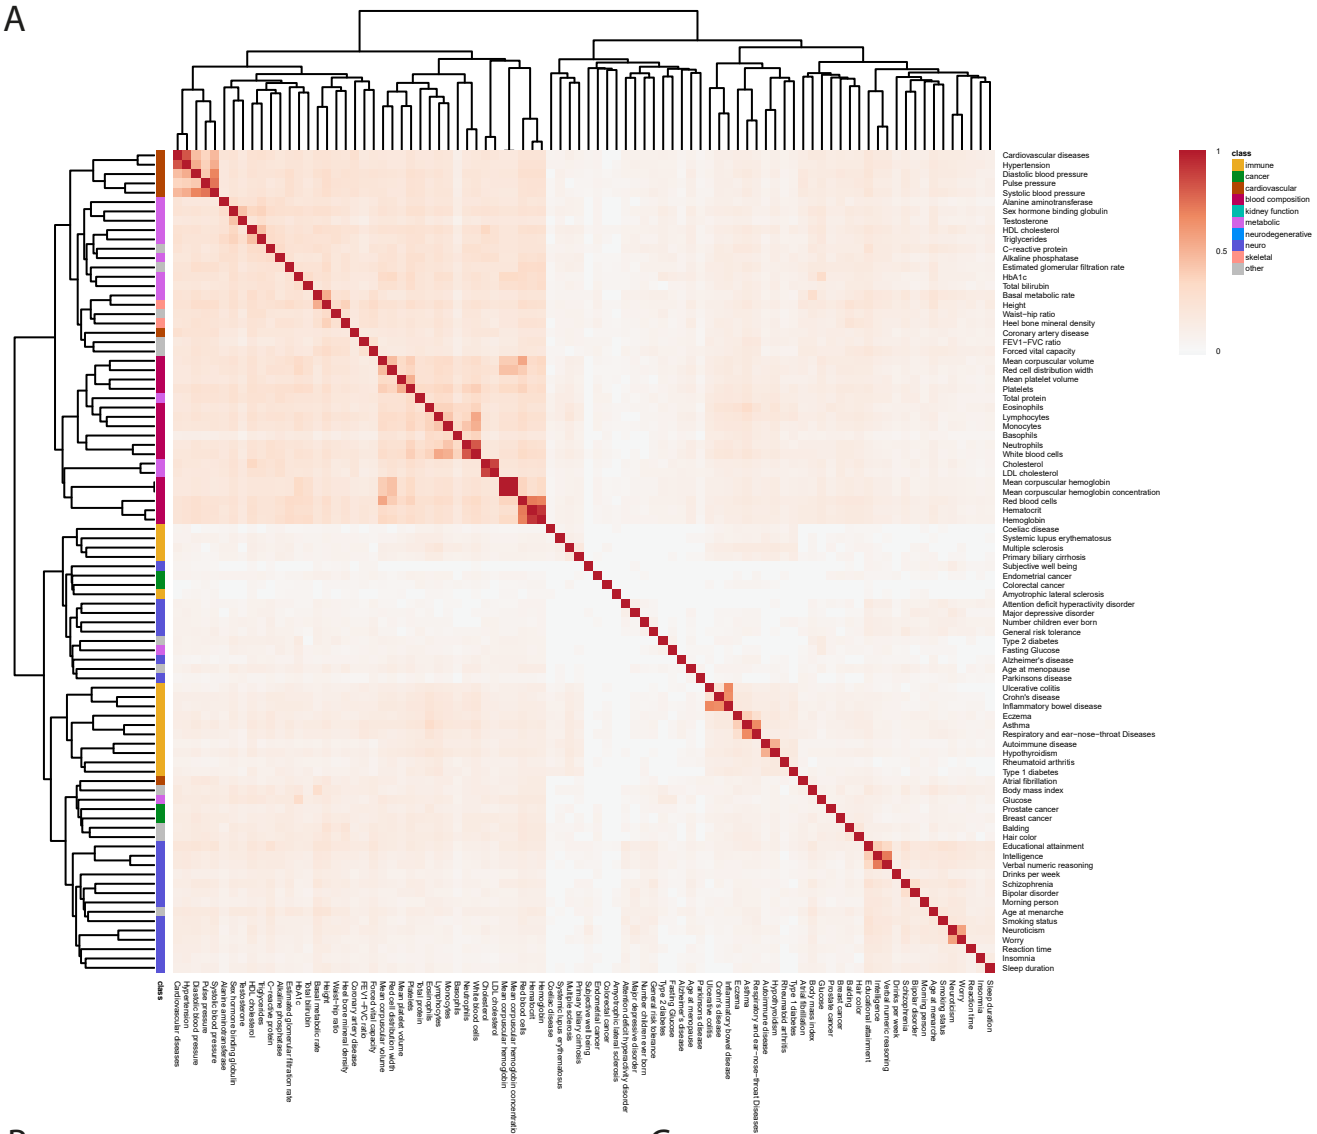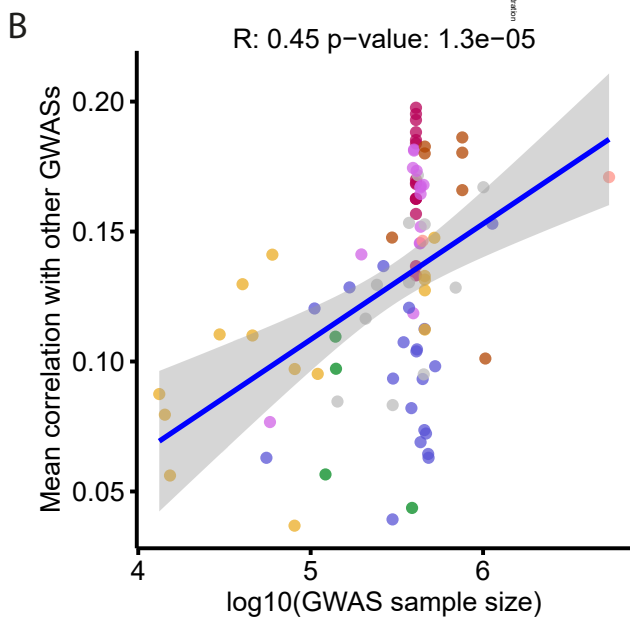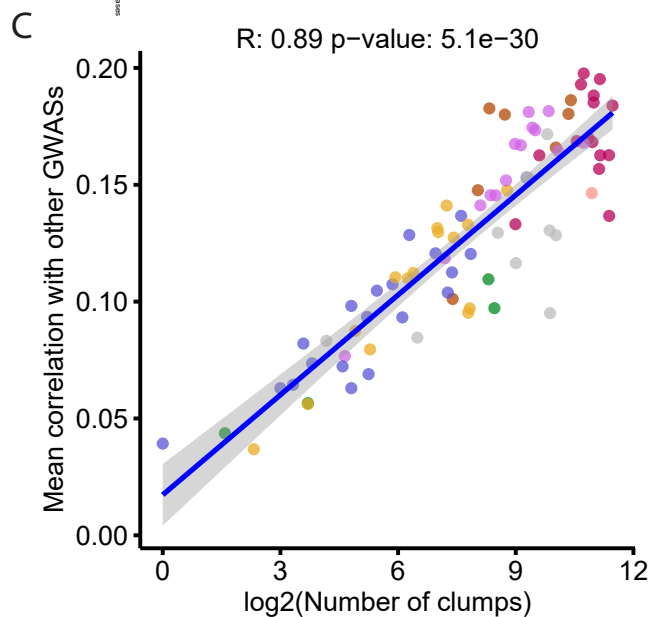

Supplement: 41598_2024_80670_MOESM2_ESM.pdf [file 41598_2024_80670_MOESM2_ESM.pdf]
